# Supplementary material for: The preparation of a special fluorescent probe with an aggregation-induced emission effect for detecting hydrazine in water
Source: Royal Society of Chemistry journal article supplement (doi:10.1039/d1nj03498g), 2021-01-01
Supplement: d1nj03498g1.pdf [file d1nj03498g1.pdf]

Supporting information

## **Preparation a special fluorescent probe with aggregation-induced emission effect for detecting hydrazine in water**

Jiamin Pan, Jie Ma\*, Hui Liu, Yuxin Zhang, and Luyu Lu

School of Science, University of Shanghai for Science and Technology, Shanghai, 200093, P. R. China.

### **Caption:**

**Fig. S1** The  $^1\text{H}$  NMR spectra of **compound 2 (PCB)**

**Fig. S2** The  $^{13}\text{C}$  NMR spectra of **compound 2 (PCB)**

**Fig. S3** The LC-MS spectra of **compound 2 (PCB)**

**Fig. S4** The  $^1\text{H}$  NMR spectra of **PCBI**

**Fig. S5** The  $^{13}\text{C}$  NMR spectra of **PCBI**

**Fig. S6** The LC-MS spectra of **PCBI**

**Fig. S7** The  $^1\text{H}$  NMR spectra of **PCBI** after reaction with trace  $\text{N}_2\text{H}_4$

**Fig. S8** Fluorescence spectra and the linear matching curve of **PCBI** probe with different concentrations of  $\text{N}_2\text{H}_4$  when  $f_w=60\%$

**Fig. S9** Electron distribution of bimolecular **PCBI**

**Equation S1** The calculation formula of LOD

Fig. S1

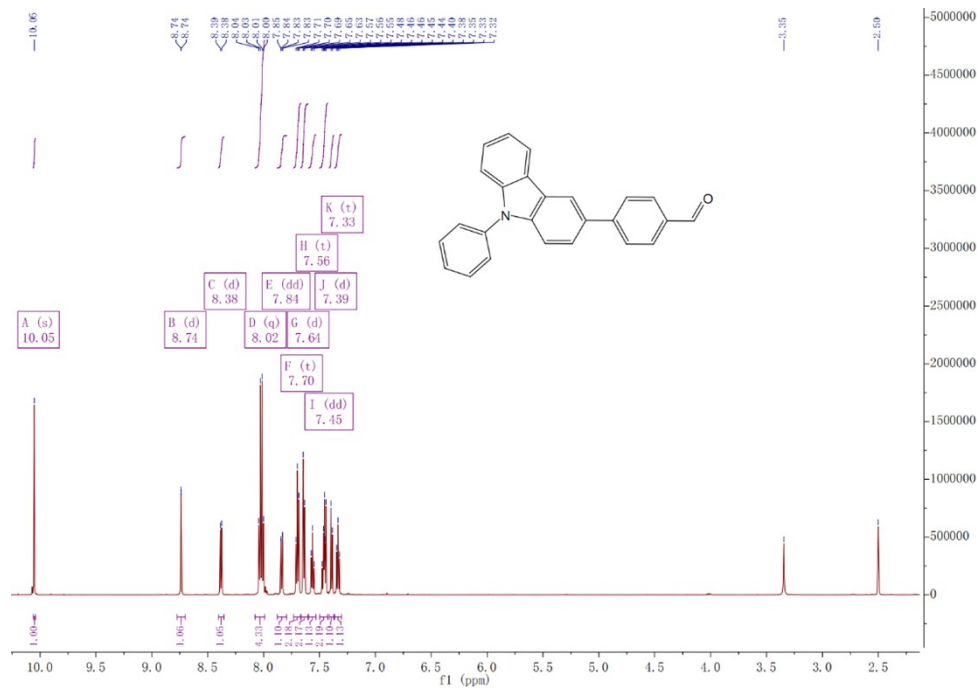

Fig. S2

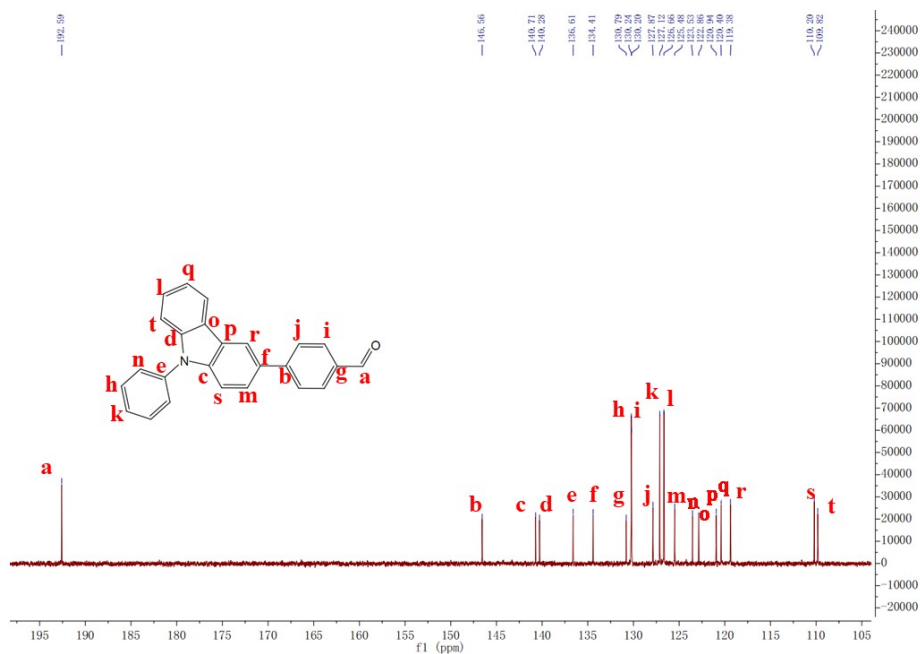

Fig. S3

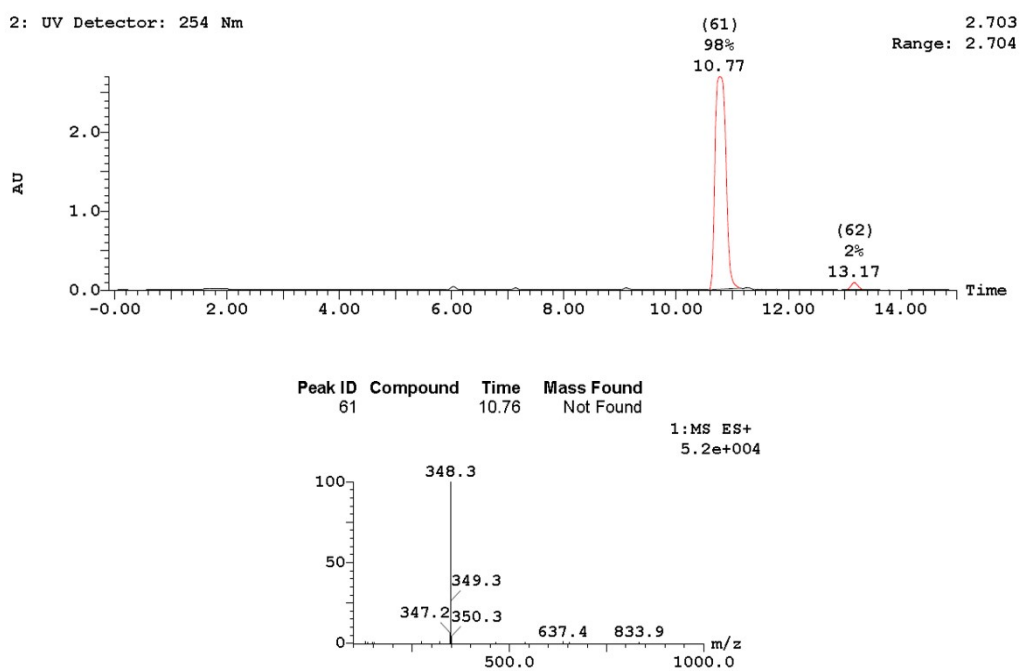

Fig. S4

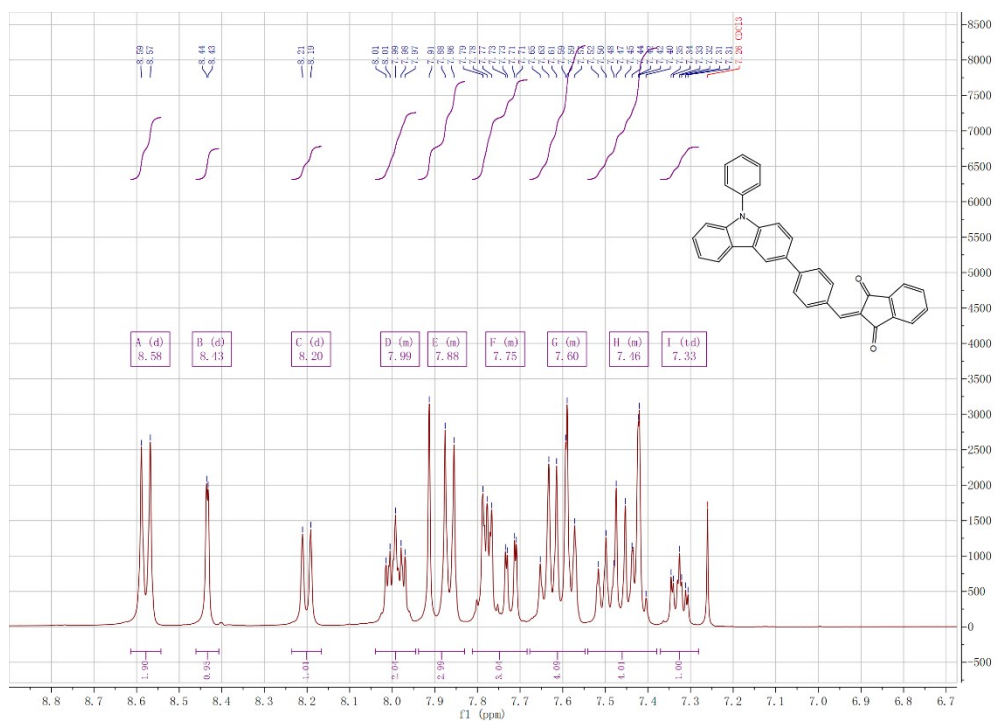

Fig. S5

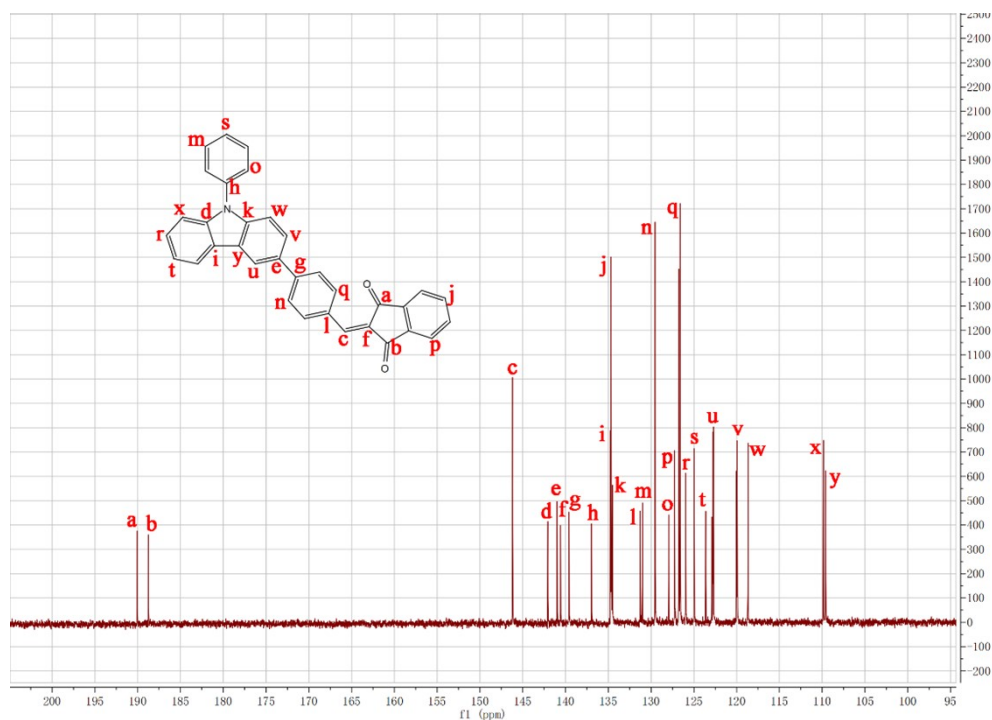

Fig. S6

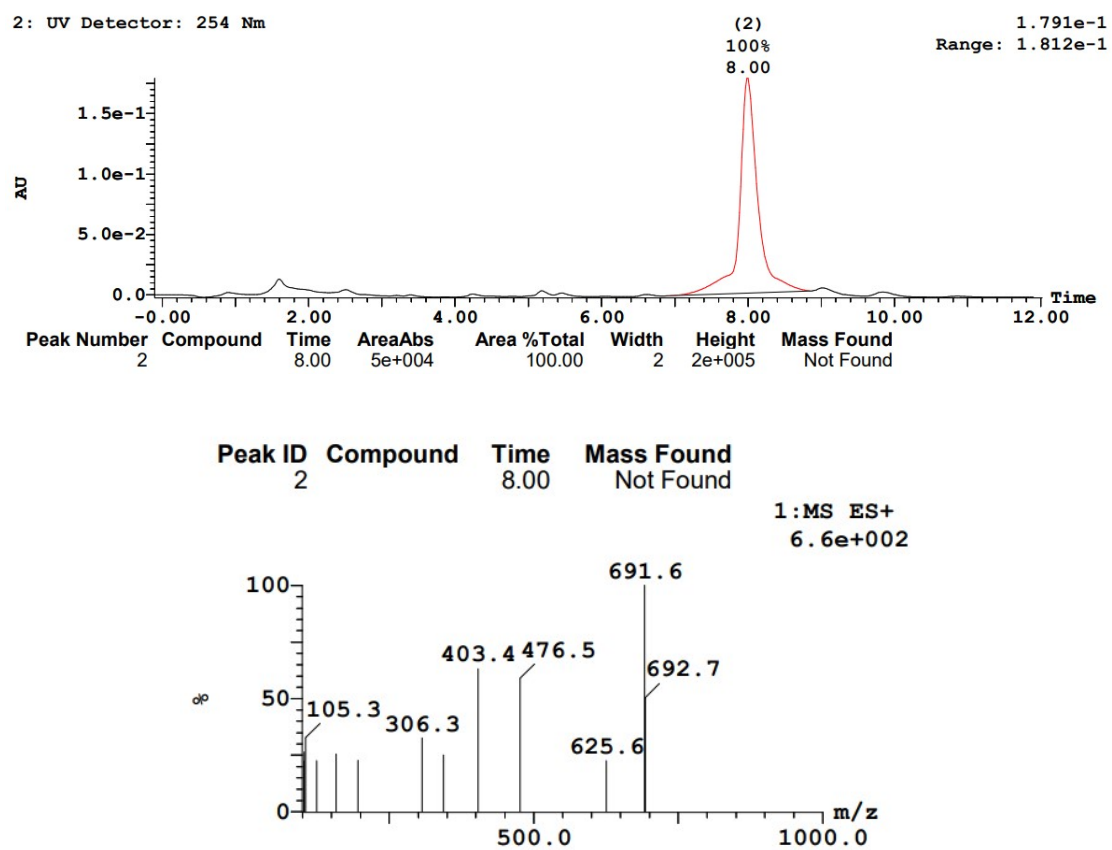

Fig. S7

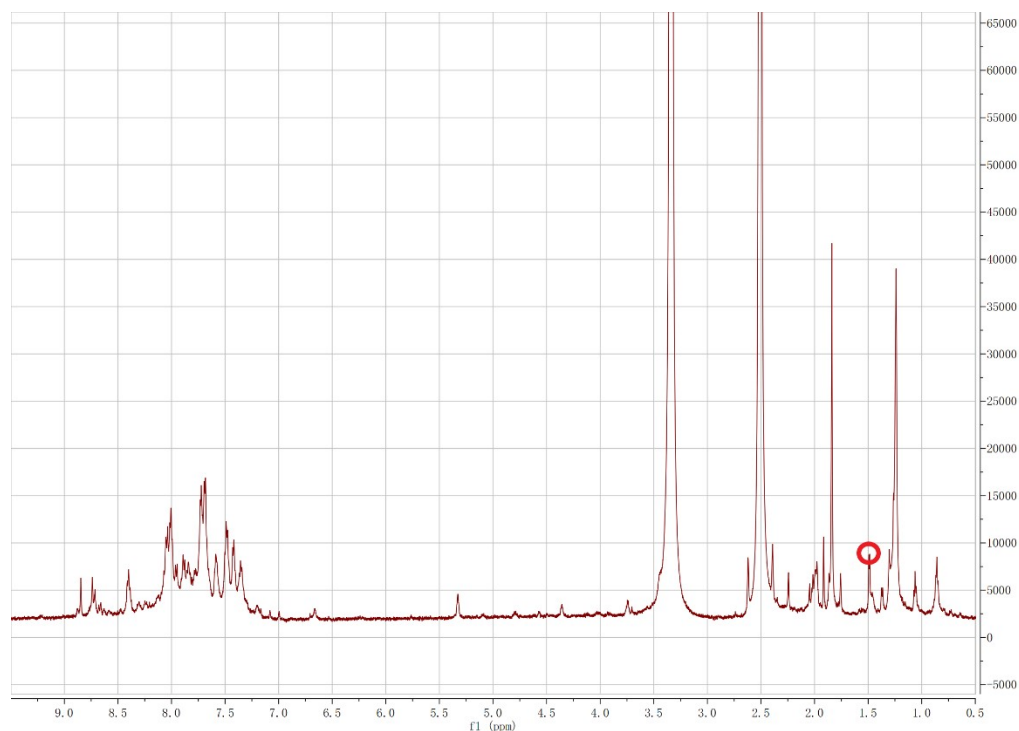

Fig. S8

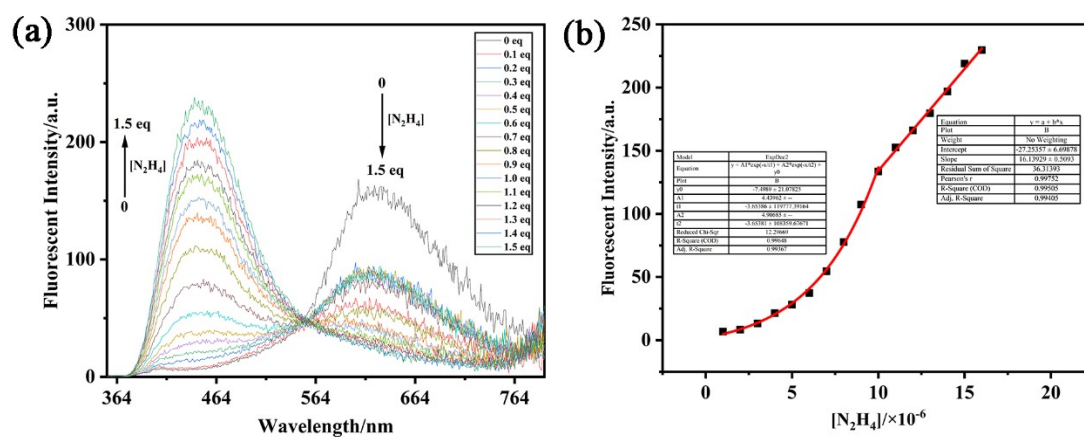

Fig. S8 (a) Fluorescence spectra of PCBI probe with different concentrations ( $0-6 \times 10^{-6} \text{ mol} \cdot \text{L}^{-1}$ ) of  $\text{N}_2\text{H}_4$  when  $f_w=60\%$ . (b) The linear matching curve of fluorescence intensity and the concentration of  $\text{N}_2\text{H}_4$  ( $0-6 \times 10^{-6} \text{ mol} \cdot \text{L}^{-1}$ ) at 447 nm.

**Fig. S9**

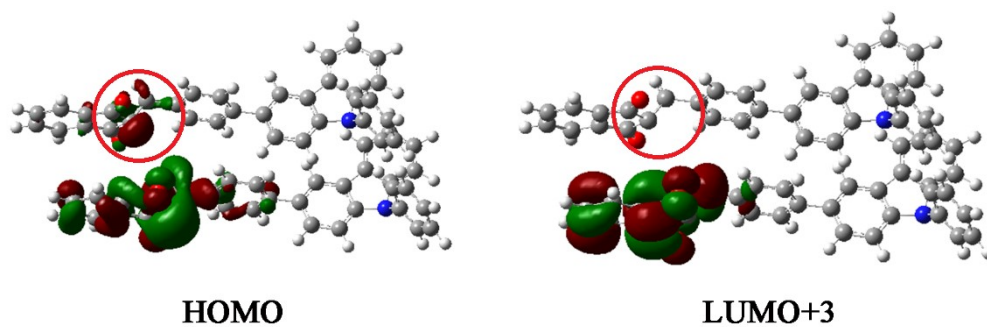

**Equation S1**

$$LOD = \frac{3\sigma}{s} \tag{1}$$

In which  $\sigma$  represents the standard deviation of fluorescence detection, and its value is 7.66.  $s$  refers to the slope of linear relationship, and its value is  $4.65 \times 10^7$ .

Therefore, the LOD of PCBI for  $N_2H_4$  is  $4.94 \times 10^{-7} \text{mol} \cdot \text{L}^{-1}$ .
